# Supplementary material for: Chemical and photochemical oxidation of organic substrates by ruthenium aqua complexes with water as an oxygen source
Source: Royal Society of Chemistry journal article supplement (doi:10.1039/c1cc12558c), 2011-01-01
Supplement: c1cc12558c.pdf [file c1cc12558c.pdf]

## Electronic Supplementary Information

### Chemical and photochemical oxidation of organic substrates by ruthenium aqua complexes with water as an oxygen source

Fei Li, <sup>\*a</sup> Miao Yu,<sup>a</sup> Yi Jiang,<sup>a</sup> Fang Huang<sup>a</sup>, Yanqing Li,<sup>a</sup> Biaobiao Zhang,<sup>a</sup> and Licheng Sun<sup>\*ab</sup>

<sup>a</sup>State Key Laboratory of Fine Chemicals, Dalian University of Technology (DUT), DUT-KTH Joint Education and Research Center on Molecular Devices, Dalian 116024, China. E-mail: lifei@dlut.edu.cn; Fax: +46 84986245; Tel: +46 84986247

<sup>b</sup>Department of Chemistry, School of Chemical Science and Engineering, Royal Institute of Technology (KTH), 100 44 Stockholm, Sweden. E-mail: lichengs@kth.se.

#### Materials

All synthetic reactions were carried out under N<sub>2</sub> atmosphere with standard Schlenk techniques. Solvents were dried and distilled prior to use according to the standard methods. Compounds [Ru(dmp)<sub>2</sub>(H<sub>2</sub>O)<sub>2</sub>](PF<sub>6</sub>)<sub>2</sub> (**1**),<sup>[1]</sup> [Ru(bpy)<sub>3</sub>]Cl<sub>2</sub><sup>[2]</sup>, Ru(tpy)Cl<sub>3</sub><sup>[3]</sup> and [Ru(tpy)(bpy)Cl]Cl<sup>[4]</sup> were prepared according to known procedures and stored in fridge under N<sub>2</sub> atmosphere. All other chemicals are commercially available. [Co(NH<sub>3</sub>)<sub>5</sub>Cl]Cl<sub>2</sub> and Ce(NH<sub>4</sub>)<sub>2</sub>(NO<sub>3</sub>)<sub>6</sub> (Ce<sup>IV</sup>) were purchased from Aldrich and Tianjin chemical company, respectively. H<sub>2</sub><sup>18</sup>O (97 atom%) was purchased from Aladdin chemical company.

#### Instruments

<sup>1</sup>H NMR Spectra were collected at 298 K using a Bruker DRX-400 instrument. Electrospray ionization mass spectra were recorded on a Q-ToF Micromass spectrometer (Manchester, England). EI-MS analyses were carried out on a gas chromatograph fitted with a mass spectrometer (GC-MS 6890/5973, Agilent, USA). UV-Vis absorption measurements were carried out on a HP 8450 spectrophotometer.

#### Synthesis of [Ru(tpy)(bpy)(H<sub>2</sub>O)](ClO<sub>4</sub>)<sub>2</sub> (**2**)

[Ru(tpy)(bpy)(H<sub>2</sub>O)](ClO<sub>4</sub>)<sub>2</sub> was synthesized by a modified procedure reported by Berlinguette.<sup>[4]</sup> To a 5 mL MeOH/H<sub>2</sub>O (1:1 v:v) solution of [Ru(tpy)(bpy)Cl]Cl (168 mg, 0.3 mmol), was added AgNO<sub>3</sub> (102 mg, 0.6 mmol), the resulting mixture was heated at reflux for 3 h and filtrated through Celite. Excess of NaClO<sub>4</sub> was added to the filtrate, slow evaporation of MeOH resulted in the formation of red crystals, which was collected and dried under vacuum (159 mg, 75 %). The structure of this complex was characterized by <sup>1</sup>H NMR, which is identical to that reported in literature.<sup>[4]</sup>

#### **General procedure for catalytic oxidation with Ce<sup>IV</sup> as oxidant**

To a N<sub>2</sub>-degassed D<sub>2</sub>O solution (1 mL) of alkene (0.1 mmol) and catalyst (0.001 mmol) was added Ce<sup>IV</sup> (0.4 mmol), the mixture was stirred at room temperature for 3 h. The final solution was directly analyzed by <sup>1</sup>H NMR spectroscopy by adding fixed amount of DMF as an internal standard. Control experiment was carried out in a similar manner described above but without catalyst.

#### **General procedure for photocatalytic oxidation**

A N<sub>2</sub>-degassed aqueous phosphate buffer solution (5 mL, pH 6.8) containing catalyst (2 × 10<sup>-5</sup> M), [Ru(bpy)<sub>3</sub>]Cl<sub>2</sub> (2 × 10<sup>-4</sup> M), organic substrate (alcohol or sulfide 2 × 10<sup>-2</sup> M) and [Co(NH<sub>3</sub>)<sub>5</sub>Cl]Cl<sub>2</sub> (2 × 10<sup>-2</sup> M) was exposed to irradiation of an Xe lamp light source (500 W) with a cut-off filter (λ > 400 nm) and stirred for 5 h at room temperature. The resulted solution was extracted with CH<sub>2</sub>Cl<sub>2</sub> for three times and dried with anhydrous Na<sub>2</sub>SO<sub>4</sub>. After removal of solvent, the products were characterized and quantified by <sup>1</sup>H NMR spectroscopy. Control experiment was carried out in a similar manner described above but without catalyst.

#### **<sup>18</sup>O labeling experiment with cyclohexene as substrate**

To a N<sub>2</sub>-degassed H<sub>2</sub><sup>18</sup>O solution (0.5 mL) of cyclohexene (0.1 mmol) and catalyst (0.001 mmol) was added Ce<sup>IV</sup> (0.4 mmol), the mixture was stirred at room temperature for 3 h. The final solution was extracted by diethyl ether and analyzed by GC-MS.

### **<sup>18</sup>O labeling experiment with thioanisole as substrate**

A N<sub>2</sub>-degassed H<sub>2</sub><sup>18</sup>O phosphate buffer solution (1 mL, pH 6.8) containing catalyst ( $2 \times 10^{-5}$  M), [Ru(bpy)<sub>3</sub>]Cl<sub>2</sub> ( $2 \times 10^{-4}$  M), organic substrate (alcohol or sulfide  $2 \times 10^{-2}$  M) and [Co(NH<sub>3</sub>)<sub>5</sub>Cl]Cl<sub>2</sub> ( $2 \times 10^{-2}$  M) was exposed to irradiation of an Xe lamp light source (500 W) with a cut-off filter ( $\lambda > 400$  nm) and stirred for 5 h at room temperature. The resulted solution was extracted with CH<sub>2</sub>Cl<sub>2</sub> and purified by a shot column. The product was finally analyzed by ESI-MS.

### **Electrochemistry**

The electrochemical measurements were recorded on a BAS-100W electrochemical potentiostat in a three-electrode cell under argon atmosphere. The working electrode was a glassy carbon disk (diameter, 3 mm) successively polished with 3 and 1  $\mu$ m diamond pastes and sonicated in ion-free water before use. The counter electrode was a platinum wire. The reference electrode was an aqueous Ag/AgCl electrode. Potential versus NHE was calibrated by using Ru(bpy)<sub>3</sub>Cl<sub>2</sub> as a reference with  $E(\text{Ru}^{\text{II/III}}) = 1.26$  V.

(a)

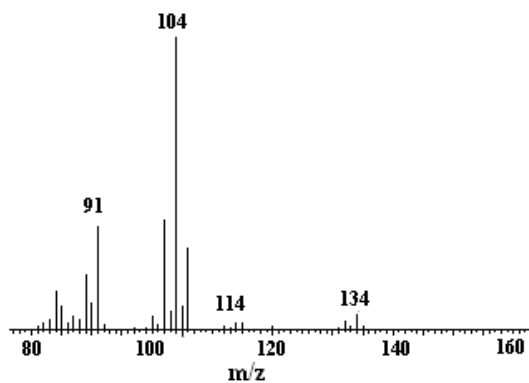

(b)

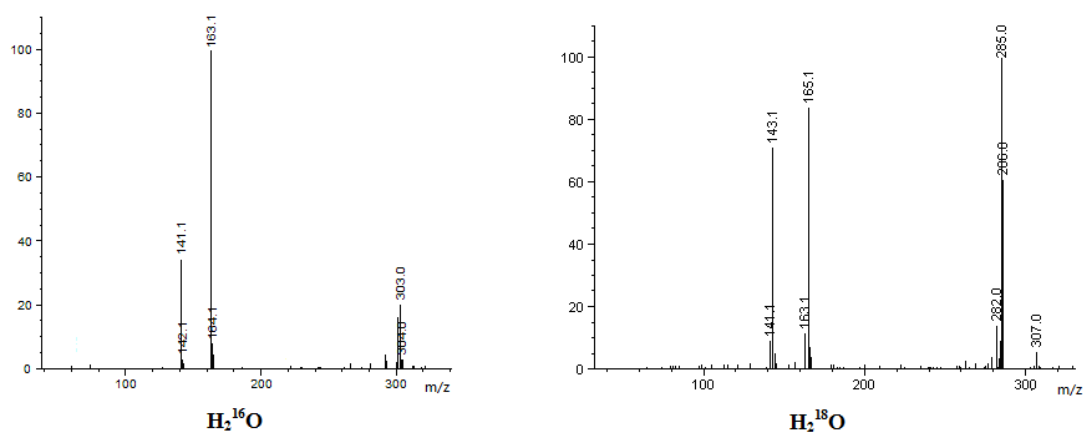

Figure S1 a) EI-MS spectrum of adipic acid generated with H<sub>2</sub><sup>18</sup>O as solvent. The spectrum is identical to that of <sup>18</sup>O labeled adipic acid reported by Kojima and Funkuzumi *et al.*<sup>[5]</sup> b) ESI-MS spectra of methyl phenyl sulfoxide generated with H<sub>2</sub><sup>16</sup>O (left) and H<sub>2</sub><sup>18</sup>O (right) as solvents. Left: PhS(<sup>16</sup>O)CH<sub>3</sub>,  $m/z = 141$  [M + H<sup>+</sup>],  $m/z = 143$  [M + Na<sup>+</sup>] and  $m/z = 303$  [2M + Na<sup>+</sup>]. Right: PhS(<sup>18</sup>O)CH<sub>3</sub>,  $m/z = 143$  [M + H<sup>+</sup>],  $m/z = 165$  [M + Na<sup>+</sup>],  $m/z = 285$  [2M + H<sup>+</sup>] and  $m/z = 307$  [2M + Na<sup>+</sup>].

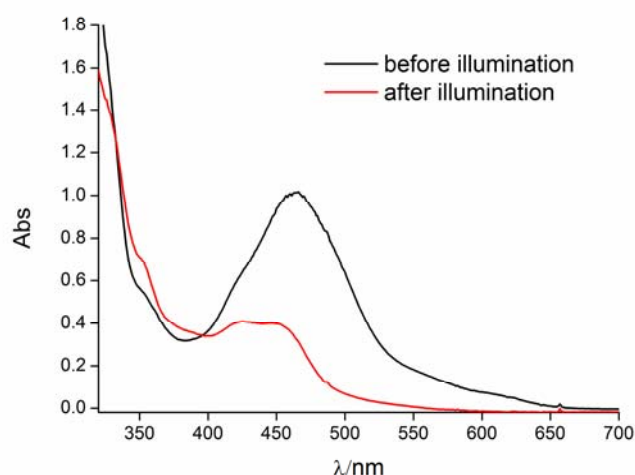

Figure S2 The adsorption of phosphate buffer solution consisting of complex **2** ( $6 \times 10^{-5}$  M),  $[\text{Ru}(\text{bpy})_3]^{2+}$  ( $3 \times 10^{-5}$  M) and  $[\text{Co}(\text{NH}_3)_5\text{Cl}]^{2+}$  ( $3 \times 10^{-4}$  M) before and after visible light illumination. The band with maximum at 460 nm arising from MLCT transitions of **2** disappears as  $\text{Ru}^{\text{II}}=\text{O}$  oxidized to  $\text{Ru}^{\text{IV}}=\text{O}$  upon illumination,<sup>[6]</sup> while the adsorption of photosensitizer at 420 and 450 nm remains.

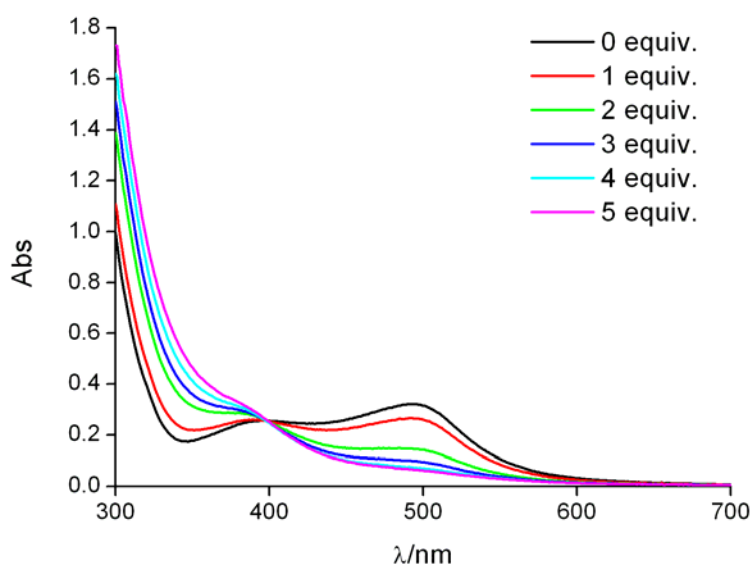

Fig. S3 UV/Vis spectral changes upon addition of 1 to 5 equiv. of  $\text{Ce}^{\text{IV}}$  into a deaerated aqueous solution of complex **1** ( $5 \times 10^{-5}$  M), which reflects the species variation from  $\text{Ru}^{\text{II}}$  to  $\text{Ru}^{\text{VI}}$ .

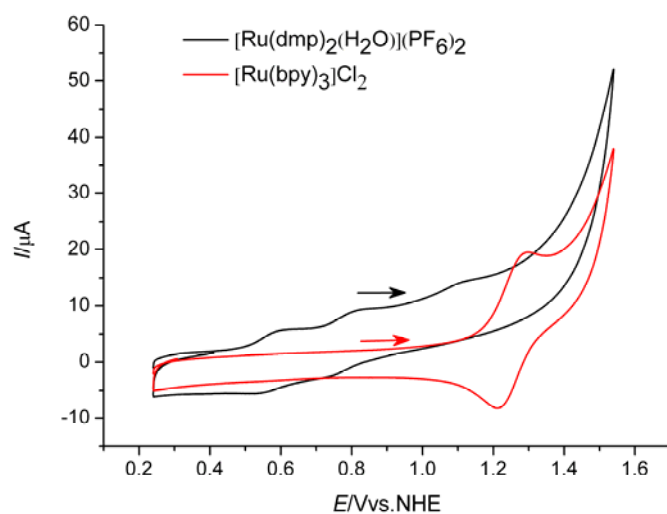

Fig. S4 Cyclic voltammograms of complex **1** (1 mM, black curve) and  $[\text{Ru}(\text{bpy})_3]^{2+}$  (1 mM, red curve) in phosphate buffer (pH 6.8, 50 mM) solutions, which indicates the oxidation of **1** by photogenerated  $[\text{Ru}(\text{bpy})_3]^{3+}$  is thermodynamically favorable. Electrode: GC, scan rate: 100 mV/s.

#### Control experiments in the absence of catalysts

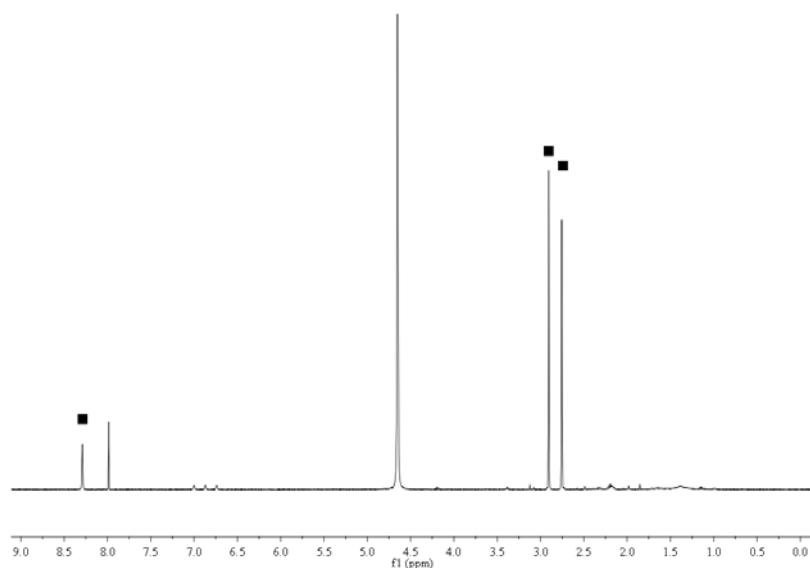

Fig. S5  $^1\text{H}$  NMR spectrum of the resulted solution from chemical oxidation of cyclohexene (internal standard DMF (■)). Reaction conditions: cyclohexene (0.1 mmol) and  $\text{Ce}^{\text{IV}}$  (0.4 mmol) in  $\text{D}_2\text{O}$  solution (1 mL) stirred for 3 h.

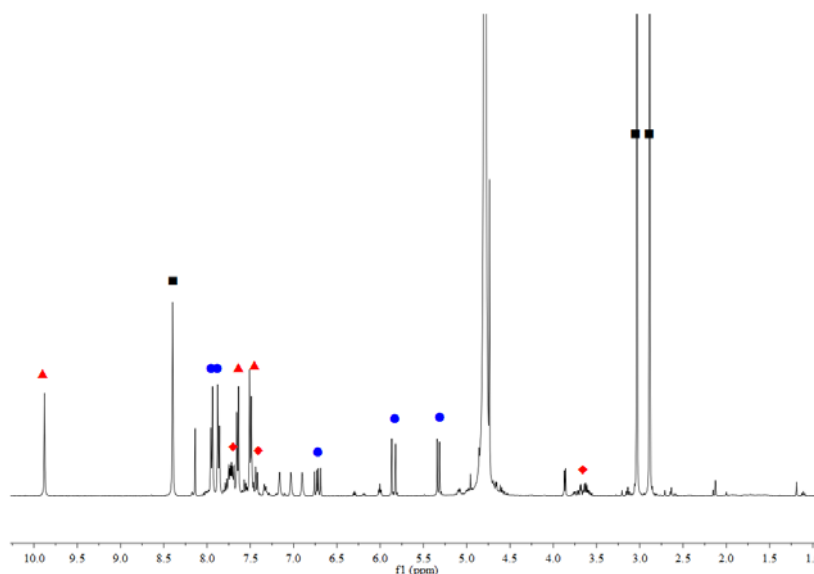

Fig. S6 <sup>1</sup>H NMR spectrum of the resulted solution from chemical oxidation of sodium *p*-styrene sulfate (sodium *p*-styrene sulfate (●), sodium 4-formylbenzenesulfonate (▲), sodium 4-(1,2-dihydroxyethyl)benzenesulfonate (◆), internal standard DMF (■)). Reaction conditions: sodium *p*-styrene sulfate (0.1 mmol) and Ce<sup>IV</sup> (0.4 mmol) in D<sub>2</sub>O solution (1 mL) stirred for 3 h.

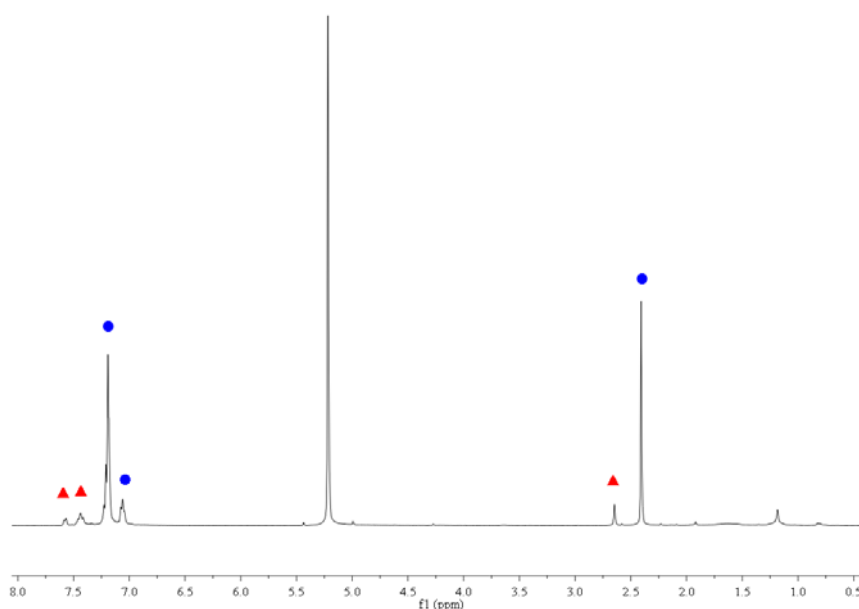

Fig. S7 <sup>1</sup>H NMR spectrum of the residue extracted by DCM from resulted solution of photocatalytic oxidation of thioanisole (solvent CDCl<sub>3</sub>, thioanisole (●), methyl phenyl sulfoxide (▲)). Reaction conditions: [Ru(bpy)<sub>3</sub>]Cl<sub>2</sub> (2 × 10<sup>-4</sup> M), sulfide (2 × 10<sup>-2</sup> M),

and  $[\text{Co}(\text{NH}_3)_5\text{Cl}]\text{Cl}_2$  ( $2 \times 10^{-2}$  M) in 5 mL neutral phosphate buffer solution stirred for 5h under visible light illumination.

### Catalytic oxidation

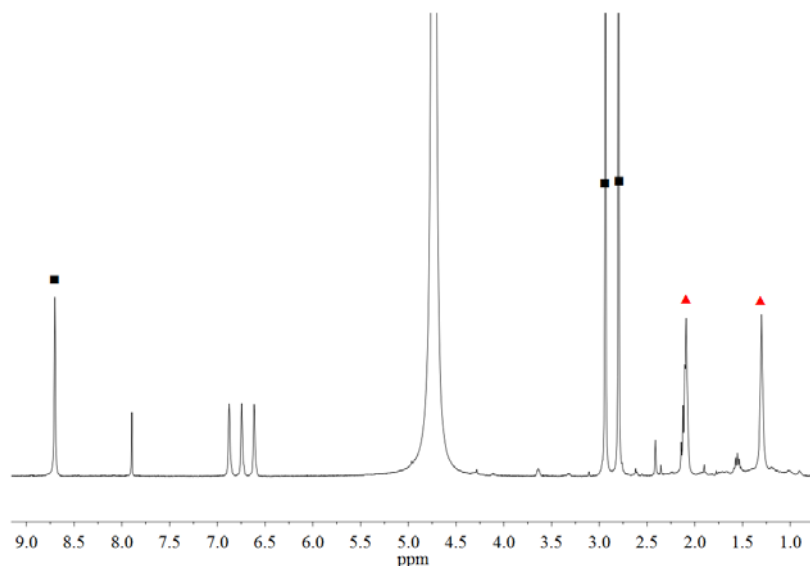

Fig. S8  $^1\text{H}$  NMR spectrum of the resulted solution from chemical oxidation of cyclohexene (adipic acid (▲), internal standard DMF (■)). Reaction conditions: complex **1** (0.001 mmol), cyclohexene (0.1 mmol) and  $\text{Ce}^{\text{IV}}$  (0.4 mmol) in  $\text{D}_2\text{O}$  solution (1 mL) stirred for 3 h.

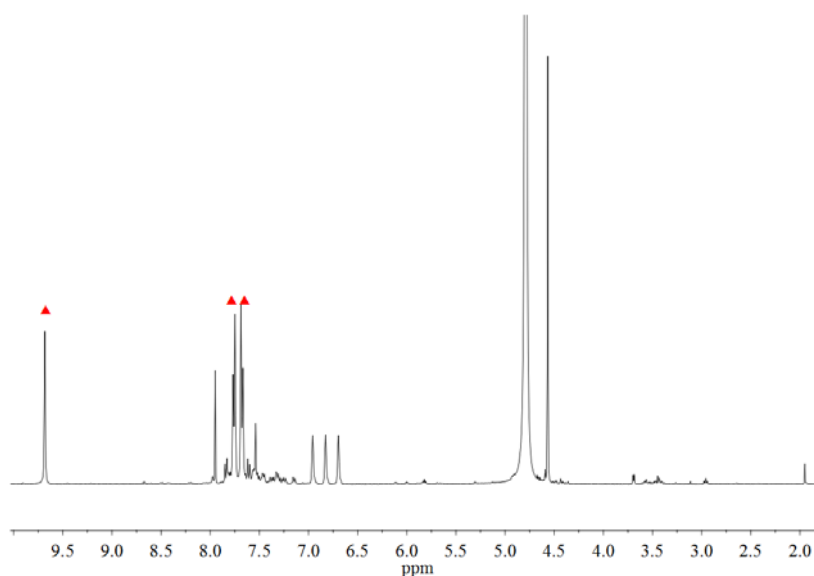

Fig. S9  $^1\text{H}$  NMR spectrum of the resulted solution from chemical oxidation of sodium *p*-styrene sulfate (sodium 4-formylbenzenesulfonate (▲) ). Reaction conditions:

complex **1** (0.001 mmol), sodium *p*-styrene sulfate (0.1 mmol) and Ce<sup>IV</sup> (0.4 mmol) in D<sub>2</sub>O solution (1 mL) stirred for 3 h.

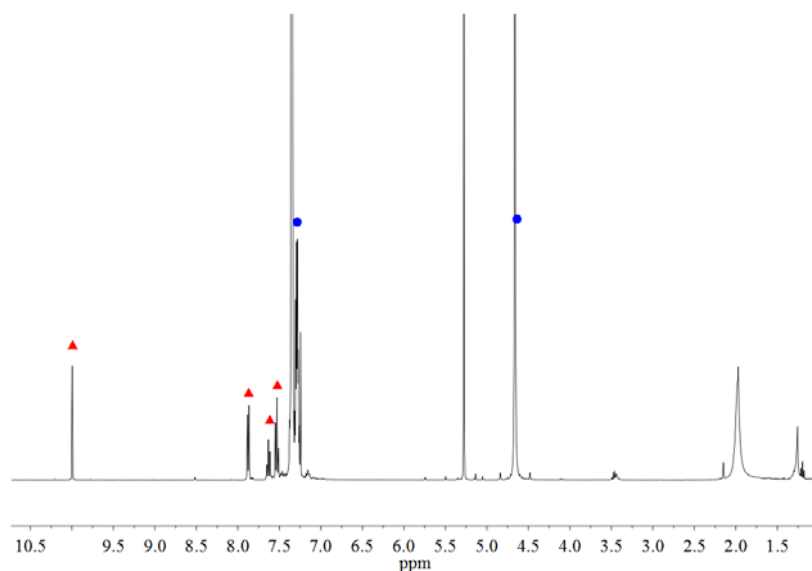

Fig. S10 <sup>1</sup>H NMR spectrum of the residue extracted by DCM from resulted solution of photocatalytic dehydrogenation of benzyl alcohol (solvent CDCl<sub>3</sub>, benzyl alcohol (●), benzaldehyde (▲)). Reaction conditions: complex **1** ( $4 \times 10^{-5}$  M), [Ru(bpy)<sub>3</sub>]Cl<sub>2</sub> ( $4 \times 10^{-4}$  M), alcohol ( $2 \times 10^{-2}$  M), and [Co(NH<sub>3</sub>)<sub>5</sub>Cl]Cl<sub>2</sub> ( $2 \times 10^{-2}$  M) in 5 mL neutral phosphate buffer solution stirred for 5h under visible light illumination.

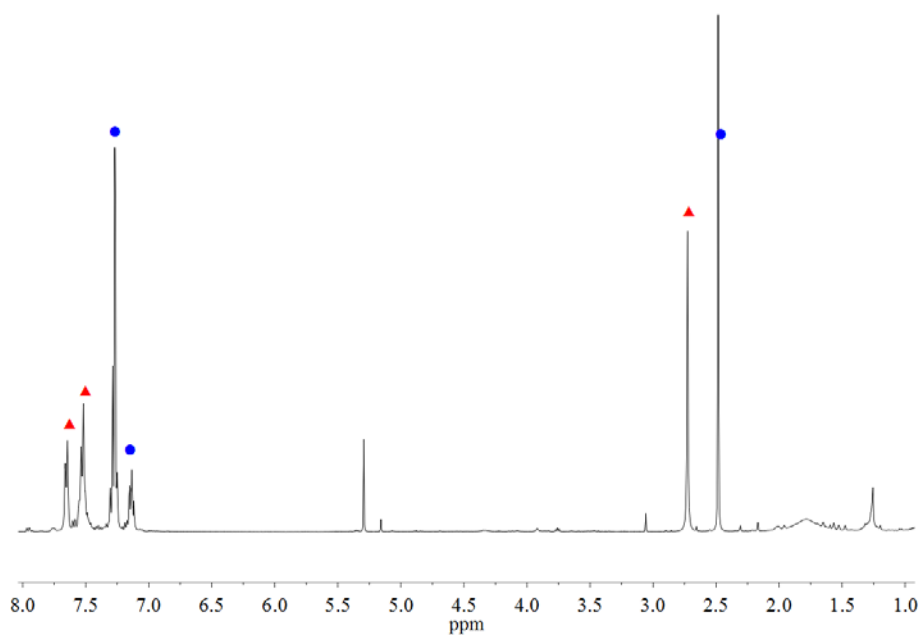

Fig. S11 <sup>1</sup>H NMR spectrum of the residue extracted by DCM from resulted solution

of photocatalytic oxidation of thioanisole (solvent  $\text{CDCl}_3$ , thioanisole (●), methyl phenyl sulfoxide (▲)). Reaction conditions: complex **1** ( $4 \times 10^{-5}$  M),  $[\text{Ru}(\text{bpy})_3]\text{Cl}_2$  ( $4 \times 10^{-4}$  M), sulfide ( $2 \times 10^{-2}$  M), and  $[\text{Co}(\text{NH}_3)_5\text{Cl}]\text{Cl}_2$  ( $2 \times 10^{-2}$  M) in 5 mL neutral phosphate buffer solution stirred for 5h under visible light illumination.

## References

- [1] J. P. Collin and J. P. Sauvage, *Inorg. Chem.*, 1986, **25**, 135.
- [2] M. S. Lowry, W. R. Hudson, R. A. Pascal, Jr., and S. Bernhard, *J. Am. Chem. Soc.*, 2004, **126**, 14129.
- [3] A. Winter, J. Hummel, N. Risch, *J. Org. Chem.*, 2006, **71**, 4862.
- [4] D. J. Wasylenko, C. Ganesamoorthy, B. D. Koivisto, M. A. Henerson and C. P. Berlinguette, *Inorg. Chem.*, 2010, **49**, 2202.
- [5] Y. Hirai, T. Kojima, Y. Mizutani, Y. Shiota, K. Yoshizawa and S. Fukuzumi, *Angew. Chem. Int. Ed.*, 2008, **47**, 5772.
- [6] W. Chen, F. N. Rein and R. C. Rocha, *Angew. Chem. Int. Ed.*, 2009, **48**, 9672.
